# Supplementary material for: Mesenchymal–Epithelial Transition Kinase Inhibitor Therapy in Patients with Advanced Papillary Renal-Cell Carcinoma: A Systematic Review and Meta-Analysis
Source: MDPI journal article supplement (doi:10.3390/ijms242417582), 2023-12-18
Supplement: s1 [file s1]

## Supplementary Material

**Table S1:** Search strategies

**Table S2.** Critical appraisal of RCTs according to the Cochrane Collaboration's tool for assessing risk of bias in RCTs (Rob2).

**Table S3.** Critical appraisal of non-RCTs according to the Cochrane Collaboration's tool for assessing risk of bias in non-RCTs (ROBINS-I).

**Figure S1:** leave-one-out sensitive-analysis of ORR

**Figure S2:** leave-one-out sensitive-analysis of DCR

**Figure S3:** leave-one-out sensitive-analysis of PFS 12 in months

**Figure S4:** leave-one-out sensitive-analysis of OS 12 in months

**Figure S5:** leave-one-out sensitive-analysis of OS 24 in months

**Figure S6:** funnel plot of ORR

**Figure S7:** funnel plot of DCR

**Figure S8:** funnel plot of PFS

**Figure S9:** funnel plot of OS 12 months

**Figure S10:** funnel plot of OS 24 months

**Figure S11.** Any grade of adverse events. **A.** Vomiting **B.** Rash **C.** Proteinuria **D.** Nausea **E.** Hyponatremia. **F.** Fatigue. **G.** Edema. **H.** Diarrhea. **I.** Diarrhea. **J.** Increased AST. **K.** Anorexia. **L.** Anemia. **M.** Increased ALT.

**Figure S12.** Grade  $\geq 3$  adverse events. **A.** Decreased WBC. **B.** Vomiting. **C.** Rash. **D.** Proteinuria. **E.** Decreased neutrophil Count. **F.** Nausea. **G.** Mucositis. **H.** Hyponatremia. **I.** Hypoalbuminemia. **J.** Hypertension. **K.** Fatigue. **L.** Extremity pain. **M.** Edema **N.** Dyspnea. **O.** Diarrhea. **P.** Increased creatinine. **Q.** Increased AST. **R.** Anorexia. **S.** Anemia. **T.** Increased ALT. **U.** Abdominal pain.

**Table S1:** Search strategies.

| Database | Search Strategy                                                                                                                                                                                                                                                                                                                                                                                                                                                                                                                                                                                                                                                                                                                                                                                                                                                                                                                                                                                                                                                                                                                                                                                                                                                                                                                                                                                                                                                                                                                                                                                                                                                                                                                                                                                                                                                                                                                                                                                                                                                                                    |
|----------|----------------------------------------------------------------------------------------------------------------------------------------------------------------------------------------------------------------------------------------------------------------------------------------------------------------------------------------------------------------------------------------------------------------------------------------------------------------------------------------------------------------------------------------------------------------------------------------------------------------------------------------------------------------------------------------------------------------------------------------------------------------------------------------------------------------------------------------------------------------------------------------------------------------------------------------------------------------------------------------------------------------------------------------------------------------------------------------------------------------------------------------------------------------------------------------------------------------------------------------------------------------------------------------------------------------------------------------------------------------------------------------------------------------------------------------------------------------------------------------------------------------------------------------------------------------------------------------------------------------------------------------------------------------------------------------------------------------------------------------------------------------------------------------------------------------------------------------------------------------------------------------------------------------------------------------------------------------------------------------------------------------------------------------------------------------------------------------------------|
| PubMed   | <p>((((((((((((((((((((((("Papillary renal cell carcinoma"[MeSH Terms]) OR ("Papillary renal cell carcinoma"[Title/Abstract])) OR ("Papillary renal cell carcinoma, multiple"[Title/Abstract])) OR ("Papillary renal cell carcinoma, familial"[Title/Abstract])) OR ("Papillary renal carcinoma, malignant"[Title/Abstract])) OR ("Papillary renal cell carcinoma, bilateral"[Title/Abstract])) OR ("Carcinoma, Renal Cell"[MeSH Terms]) OR ("Carcinoma, Renal Cell"[Title/Abstract])) OR ("Carcinomas, Renal Cell"[Title/Abstract])) OR ("Renal Cell Carcinomas"[Title/Abstract])) OR ("Renal Carcinomas"[Title/Abstract])) OR ("Kidney Neoplasms"[MeSH Terms]) OR ("Kidney Neoplasms"[Title/Abstract])) OR ("Kidney Neoplasm"[Title/Abstract])) OR ("Neoplasm, Kidney"[Title/Abstract])) OR ("Renal Neoplasms"[Title/Abstract])) OR ("Neoplasm, Renal"[Title/Abstract])) OR ("Neoplasms, Renal"[Title/Abstract])) OR ("Renal Neoplasm"[Title/Abstract])) OR ("Neoplasms, Kidney"[Title/Abstract])) OR ("Cancer of Kidney"[Title/Abstract])) OR ("Kidney Cancers"[Title/Abstract])) OR ("Renal Cancer"[Title/Abstract])) OR ("Cancer, Renal"[Title/Abstract])) OR ("Cancers, Renal"[Title/Abstract])) OR ("Renal Cancers"[Title/Abstract])) OR ("Cancer of the Kidney"[Title/Abstract])) OR ("Kidney Cancer"[Title/Abstract])) OR ("Cancer, Kidney"[Title/Abstract])) OR ("Cancers, Kidney"[Title/Abstract])) AND (((((((((((((((("c-MET inhibitor"[Title/Abstract])) OR ("c-MET inhibitors"[Title/Abstract])) OR ("MET inhibitor"[Title/Abstract])) OR ("MET inhibitors"[Title/Abstract])) OR ("Cabozantinib"[Title/Abstract])) OR ("Crizotinib"[Title/Abstract])) OR ("Crizotinib"[MeSH Terms]) OR ("Cabozantinib"[MeSH Terms])) OR ("Tivantinib"[Title/Abstract])) OR ("Foretinib"[Title/Abstract])) OR ("Savolitinib"[Title/Abstract])) OR ("AMG-208"[MeSH Terms]) OR ("AMG-208"[Title/Abstract])) OR ("PF-04217903"[Title/Abstract])) OR ("BMS777607"[Title/Abstract])) OR ("NVP-BVU972"[Title/Abstract])) OR ("PHA-665752"[Title/Abstract]) OR ("MET-directed agents"[Title/Abstract]))</p> |
| Scopus   | <p>("Papillary renal cell carcinoma") OR TITLE-ABS-KEY("Papillary renal cell carcinoma") OR TITLE-ABS-KEY("Papillary renal cell carcinoma, multiple") OR TITLE-ABS-KEY("Papillary renal cell carcinoma, familial") OR TITLE-ABS-KEY("Papillary renal cell carcinoma, malignant") OR TITLE-ABS-KEY("Papillary renal cell carcinoma, bilateral") OR MESH("Carcinoma, Renal Cell") OR TITLE-ABS-KEY("Carcinoma, Renal Cell") OR TITLE-ABS-KEY("Carcinomas, Renal Cell") OR TITLE-ABS-KEY("Renal Cell Carcinomas") OR TITLE-ABS-KEY("Renal Carcinomas") OR MESH("Kidney Neoplasms") OR TITLE-ABS-KEY("Kidney Neoplasms") OR TITLE-ABS-KEY("Kidney Neoplasm") OR TITLE-ABS-KEY("Neoplasm, Kidney") OR TITLE-ABS-KEY("Renal Neoplasms") OR TITLE-ABS-KEY("Neoplasm, Renal") OR TITLE-ABS-KEY("Neoplasms, Renal") OR TITLE-ABS-KEY("Renal Neoplasm") OR TITLE-ABS-KEY("Neoplasms, Kidney") OR TITLE-ABS-KEY("Cancer of Kidney") OR TITLE-ABS-KEY("Kidney Cancers") OR TITLE-ABS-KEY("Renal Cancer") OR TITLE-ABS-KEY("Cancer, Renal") OR TITLE-ABS-KEY("Cancers, Renal") OR TITLE-ABS-KEY("Renal Cancers") OR TITLE-ABS-KEY("Cancer of the Kidney") OR TITLE-ABS-KEY("Kidney Cancer") OR</p>                                                                                                                                                                                                                                                                                                                                                                                                                                                                                                                                                                                                                                                                                                                                                                                                                                                                                                              |

TITLE-ABS-KEY("Cancer, Kidney") OR TITLE-ABS-KEY("Cancers, Kidney")) AND ((TITLE-ABS-KEY("c-MET inhibitor") OR TITLE-ABS-KEY("c-MET inhibitors") OR TITLE-ABS-KEY("MET inhibitor") OR TITLE-ABS-KEY("MET inhibitors") OR TITLE-ABS-KEY("Cabozantinib") OR TITLE-ABS-KEY("Crizotinib") OR TITLE-ABS-KEY("AMG-208") OR TITLE-ABS-KEY("PF-04217903") OR TITLE-ABS-KEY("BMS777607") OR TITLE-ABS-KEY("NVP-BVU972") OR TITLE-ABS-KEY("PHA-665752") OR TITLE-ABS-KEY("MET-directed agents")))

The Cochrane Library

("Papillary renal cell carcinoma"):ti,ab,kw OR ("Papillary renal cell carcinoma"):ti,ab,kw OR ("Papillary renal cell carcinoma, multiple"):ti,ab,kw OR ("Papillary renal cell carcinoma, familial"):ti,ab,kw OR ("Papillary renal cell carcinoma, malignant"):ti,ab,kw OR ("Papillary renal cell carcinoma, bilateral"):ti,ab,kw OR ("Carcinoma, Renal Cell"):ti,ab,kw OR ("Carcinoma, Renal Cell"):ti,ab,kw OR ("Carcinomas, Renal Cell"):ti,ab,kw OR ("Renal Cell Carcinomas"):ti,ab,kw OR ("Renal Carcinomas"):ti,ab,kw OR ("Kidney Neoplasms"):ti,ab,kw OR ("Kidney Neoplasms"):ti,ab,kw OR ("Kidney Neoplasm"):ti,ab,kw OR ("Neoplasm, Kidney"):ti,ab,kw OR ("Renal Neoplasms"):ti,ab,kw OR ("Neoplasm, Renal"):ti,ab,kw OR ("Neoplasms, Renal"):ti,ab,kw OR ("Renal Neoplasm"):ti,ab,kw OR ("Neoplasms, Kidney"):ti,ab,kw OR ("Cancer of Kidney"):ti,ab,kw OR ("Kidney Cancers"):ti,ab,kw OR ("Renal Cancer"):ti,ab,kw OR ("Cancer, Renal"):ti,ab,kw OR ("Cancers, Renal"):ti,ab,kw OR ("Renal Cancers"):ti,ab,kw OR ("Cancer of the Kidney"):ti,ab,kw OR ("Kidney Cancer"):ti,ab,kw OR ("Cancer, Kidney"):ti,ab,kw OR ("Cancers, Kidney"):ti,ab,kw) AND ("c-MET inhibitor"):ti,ab,kw OR ("c-MET inhibitors"):ti,ab,kw OR ("MET inhibitor"):ti,ab,kw OR ("MET inhibitors"):ti,ab,kw OR ("Cabozantinib"):ti,ab,kw OR ("Crizotinib"):ti,ab,kw OR ("AMG-208"):ti,ab,kw OR ("PF-04217903"):ti,ab,kw OR ("BMS777607"):ti,ab,kw OR ("NVP-BVU972"):ti,ab,kw OR ("PHA-665752"):ti,ab,kw OR ("MET-directed agents"):ti,ab,kw)

**Table S2:** Critical appraisal of RCTs according to the Cochrane Collaboration’s tool for assessing risk of bias in RCTs (Rob2). Datas were sourced from reference [1–3].

|       |                  | Risk of bias domains                                                                                                                                                                                                                                        |    |    |    |    |                  |
|-------|------------------|-------------------------------------------------------------------------------------------------------------------------------------------------------------------------------------------------------------------------------------------------------------|----|----|----|----|------------------|
|       |                  | D1                                                                                                                                                                                                                                                          | D2 | D3 | D4 | D5 | Overall          |
| Study | SWOG S1107, 2017 |                                                                                                                                                                                                                                                             |    |    |    |    |                  |
|       | Sumanta, 2021    |                                                                                                                                                                                                                                                             |    |    |    |    |                  |
|       | SAVOIR, 2020     |                                                                                                                                                                                                                                                             |    |    |    |    |                  |
|       |                  | Domains:<br>D1: Bias arising from the randomization process.<br>D2: Bias due to deviations from intended intervention.<br>D3: Bias due to missing outcome data.<br>D4: Bias in measurement of the outcome.<br>D5: Bias in selection of the reported result. |    |    |    |    | Judgement<br>Low |

**Table S3:** Critical appraisal of non-RCTs according to the Cochrane Collaboration’s tool for assessing risk of bias in non-RCTs (ROBINS-I). Datas were sourced from reference [4–9]

|       |                 | Risk of bias domains                                    |    |    |    |    |    |    |            |
|-------|-----------------|---------------------------------------------------------|----|----|----|----|----|----|------------|
|       |                 | D1                                                      | D2 | D3 | D4 | D5 | D6 | D7 | Overall    |
| Study | Schoffski, 2017 | −                                                       | +  | +  | +  | +  | +  | +  | −          |
|       | Choueiri, 2017a | +                                                       | +  | +  | +  | +  | +  | +  | +          |
|       | Choueiri, 2017b | +                                                       | +  | +  | +  | +  | +  | +  | +          |
|       | Chanzá, 2019    | +                                                       | −  | +  | +  | +  | +  | +  | −          |
|       | Tachibana, 2022 | +                                                       | −  | +  | +  | +  | −  | +  | −          |
|       | CALYPSO, 2023   | +                                                       | +  | +  | +  | +  | +  | +  | +          |
|       |                 | Domains:                                                |    |    |    |    |    |    | Judgement  |
|       |                 | D1: Bias due to confounding.                            |    |    |    |    |    |    | − Moderate |
|       |                 | D2: Bias due to selection of participants.              |    |    |    |    |    |    | +          |
|       |                 | D3: Bias in classification of interventions.            |    |    |    |    |    |    | Low        |
|       |                 | D4: Bias due to deviations from intended interventions. |    |    |    |    |    |    |            |
|       |                 | D5: Bias due to missing data.                           |    |    |    |    |    |    |            |
|       |                 | D6: Bias in measurement of outcomes.                    |    |    |    |    |    |    |            |
|       |                 | D7: Bias in selection of the reported result.           |    |    |    |    |    |    |            |

**Figure S1:** leave-one-out sensitive-analysis of ORR. Datas were sourced from reference [1,2,4–10]

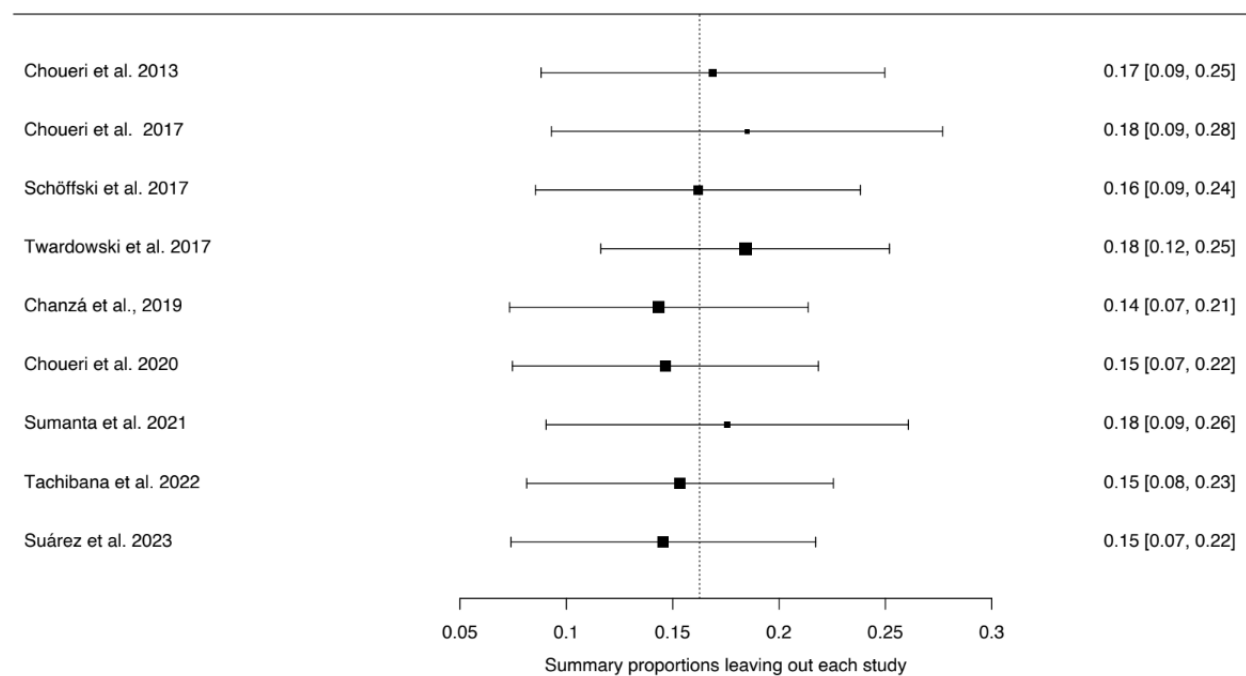

**Figure S2:** leave-one-out sensitive-analysis of DCR. Datas were sourced from reference [2,4–9]

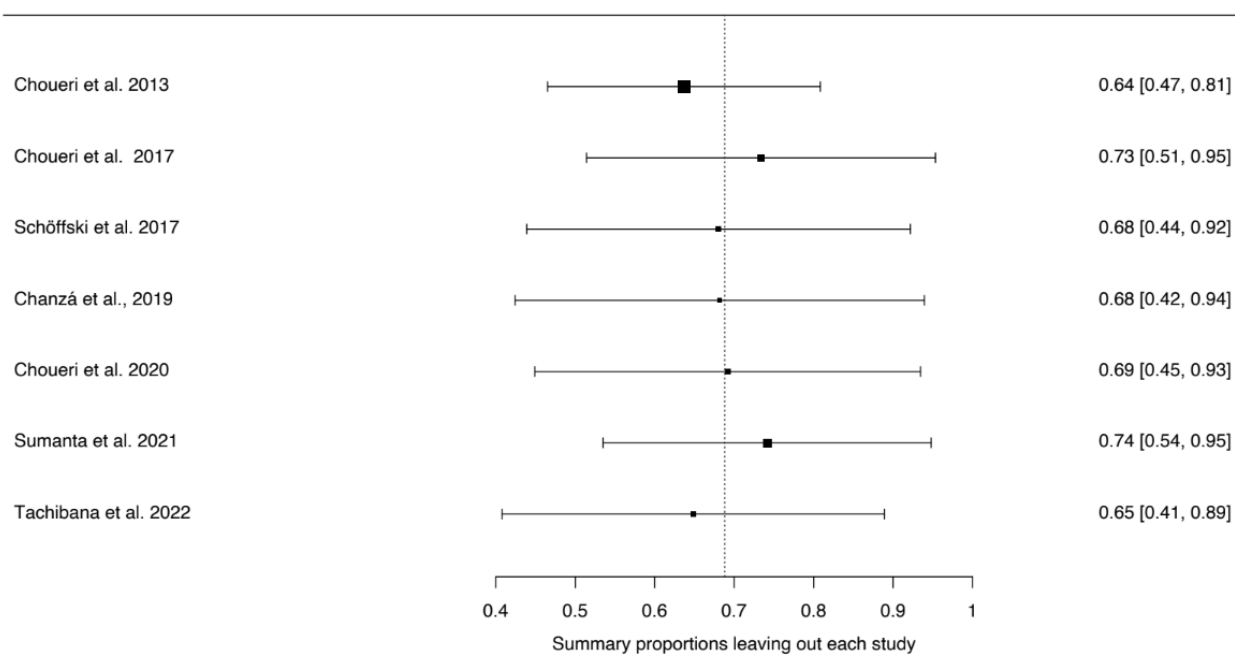

**Figure S3:** leave-one-out sensitive-analysis of PFS. Datas were sourced from reference [2,4–9].

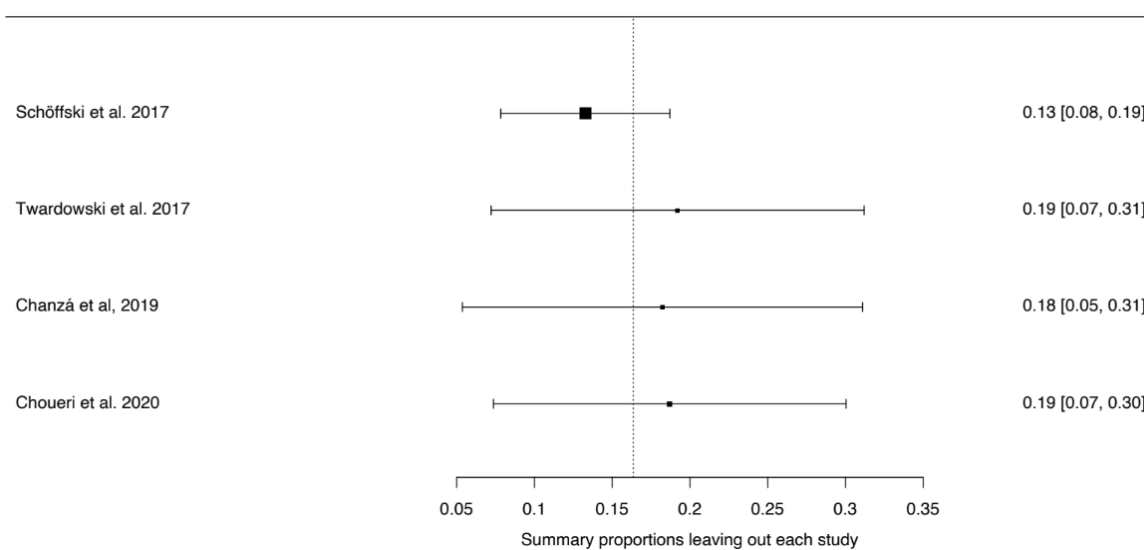

**Figure S4:** leave-one-out sensitive-analysis of OS 12 months. Datas were sourced from reference [1,4,7,9].

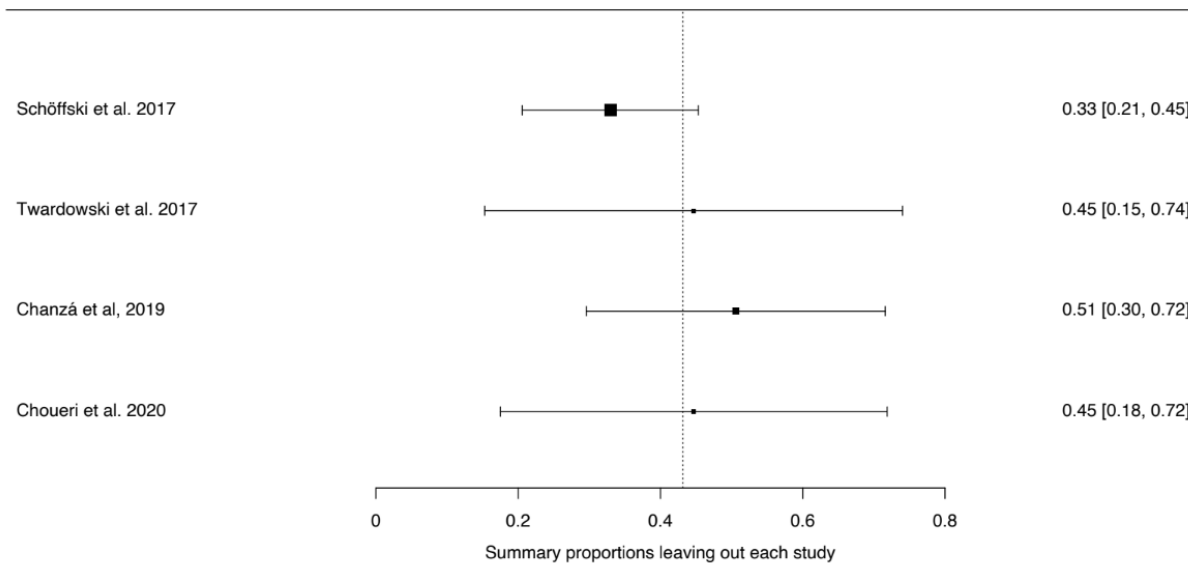

**Figure S5:** leave-one-out sensitive-analysis of OS 24 months. Datas were sourced from reference [4,7,9].

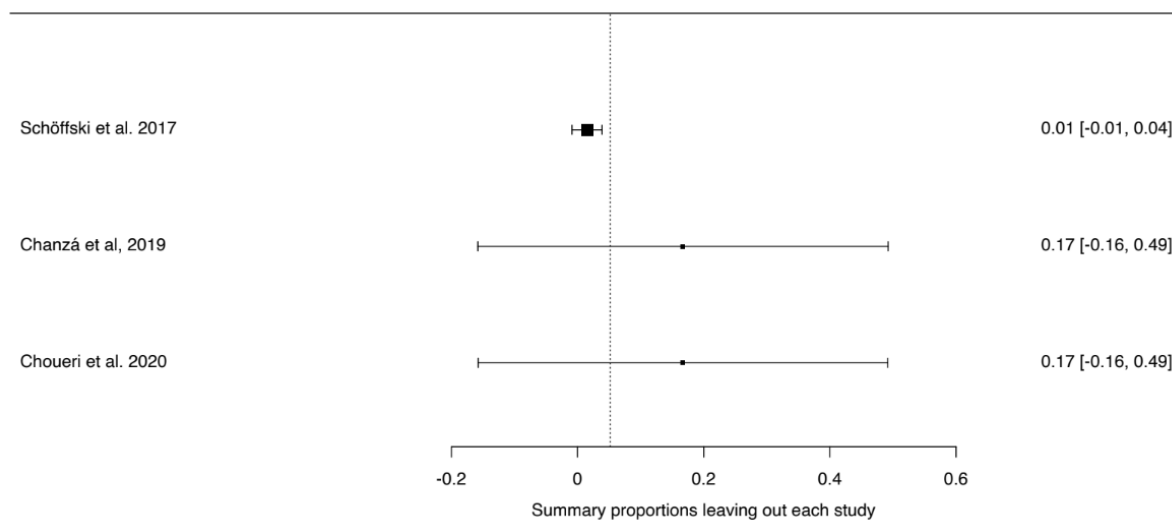

**Figure S6:** funnel plot of ORR. Datas were sourced from reference [1,6,7].

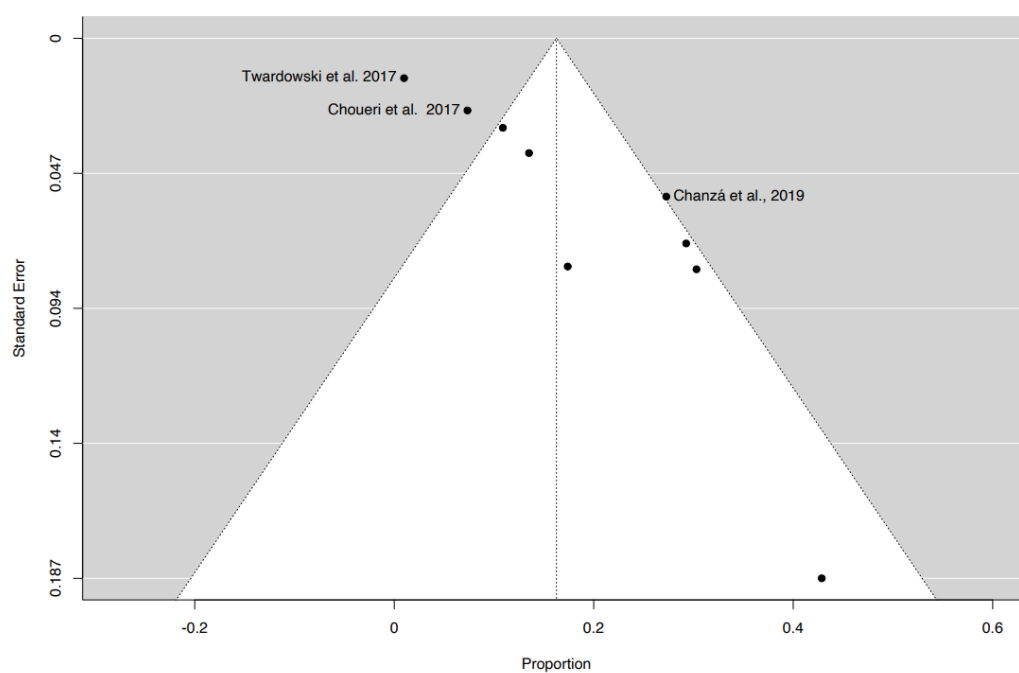

**Figure S7:** funnel plot of DCR. Datas were sourced from reference [2,6,8,9].

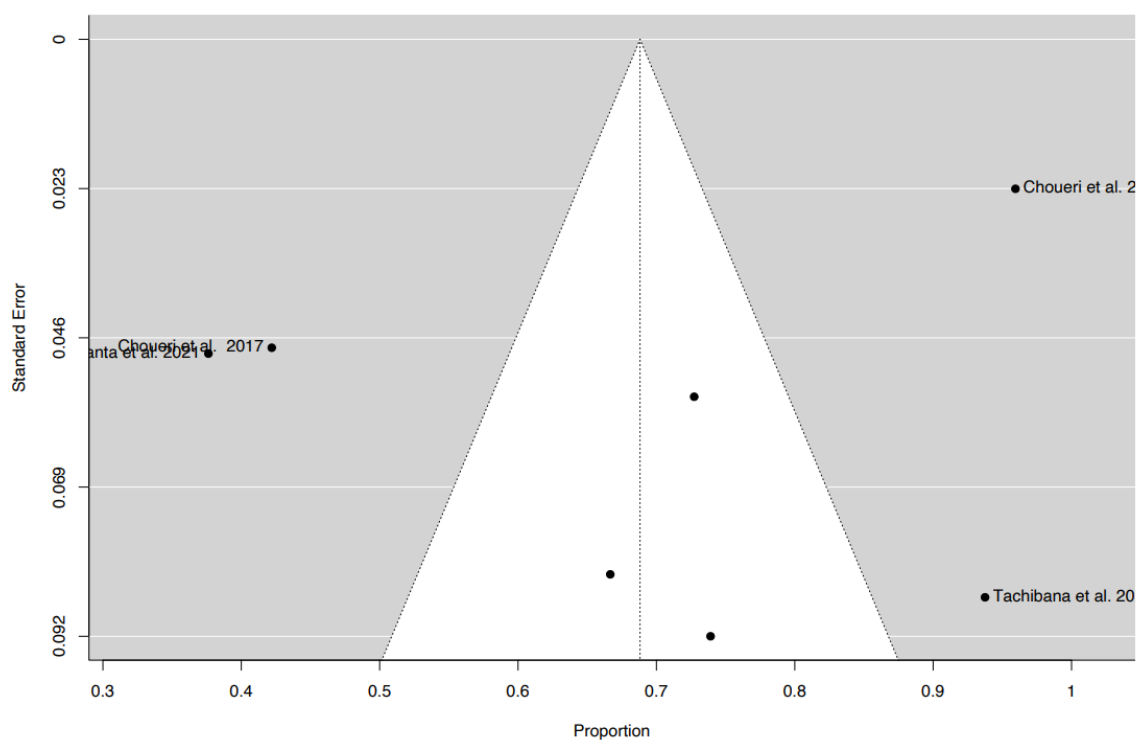

**Figure S8:** Funnel plot of PFS. Datas were sourced from reference [4].

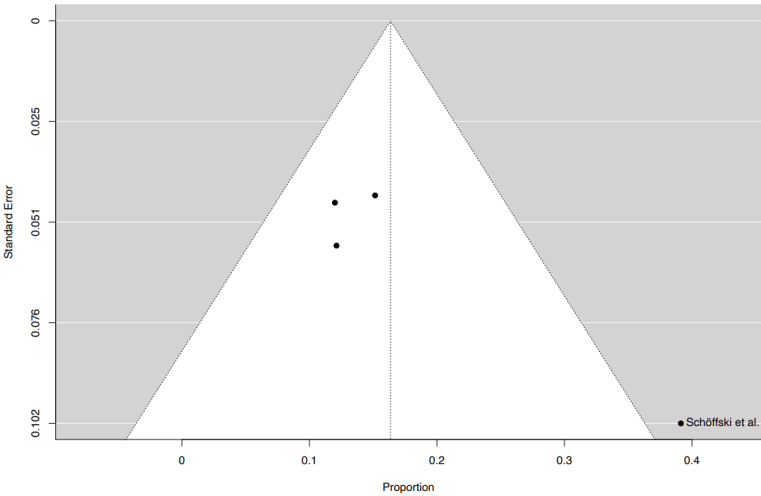

**Figure S9:** Funnel plot of OS 12 months. Datas were sourced from reference [4,7].

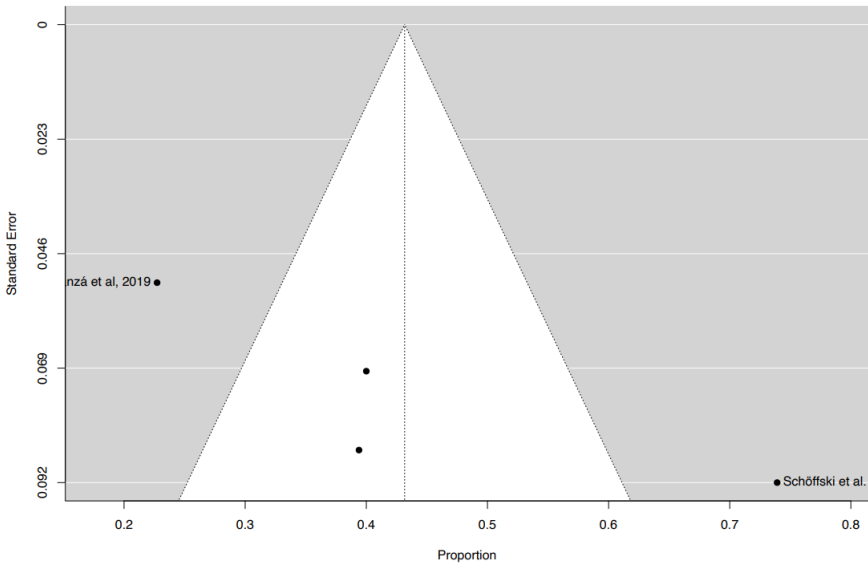

**Figure S10:** Funnel plot of OS 24 months. Datas were sourced from reference [4,7].

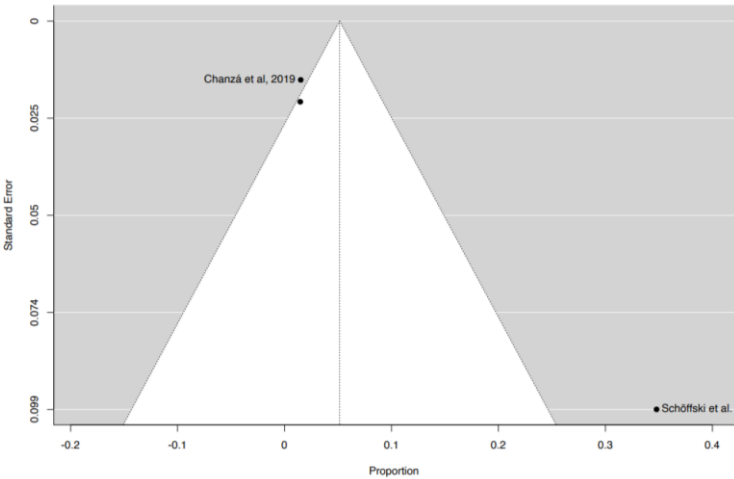



**Figure S11.** Any grade of adverse events. **A.** Vomiting **B.** Rash **C.** Proteinuria **D.** Nausea **E.** Hyponatremia. **F.** Fatigue. **G.** Edema. **H.** Diarrhea. **I.** Diarrhea. **J.** Increased AST. **K.** Anorexia. **L.** Anemia. **M.** Increased ALT. Datas were sourced from reference [2,4–6].

### A. Vomiting

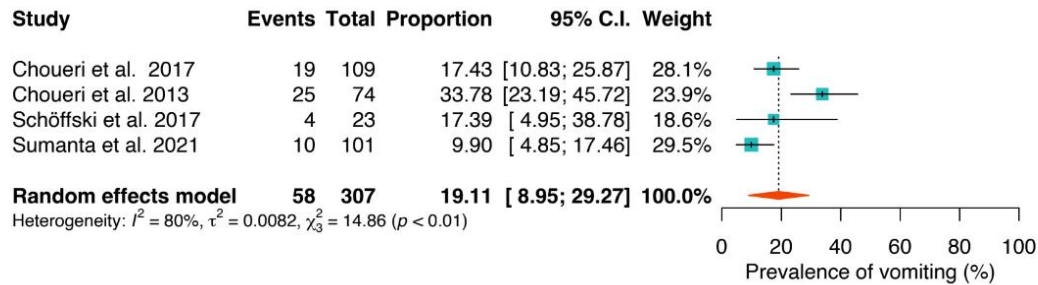

### B. Rash

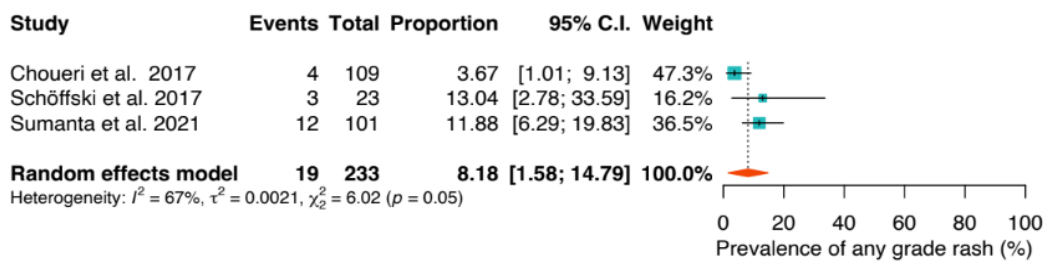

### C. Proteinuria

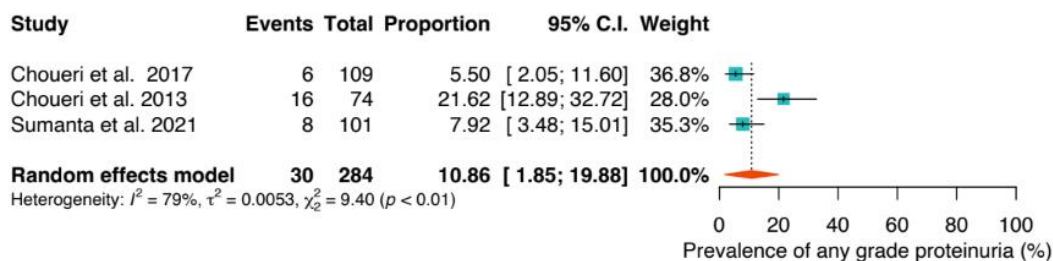

## D. Nausea

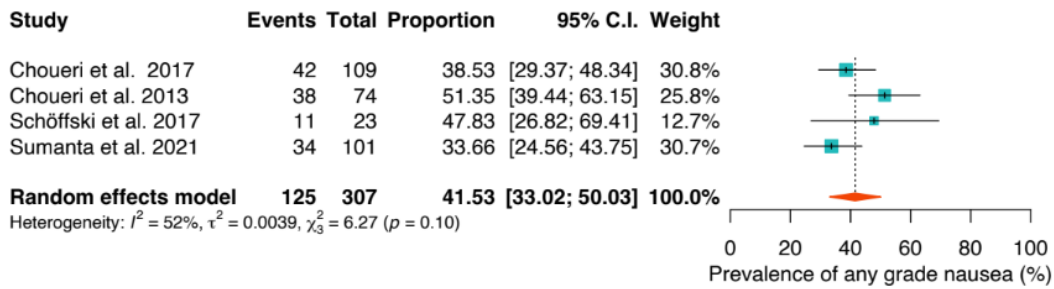

## E. Hyponatremia

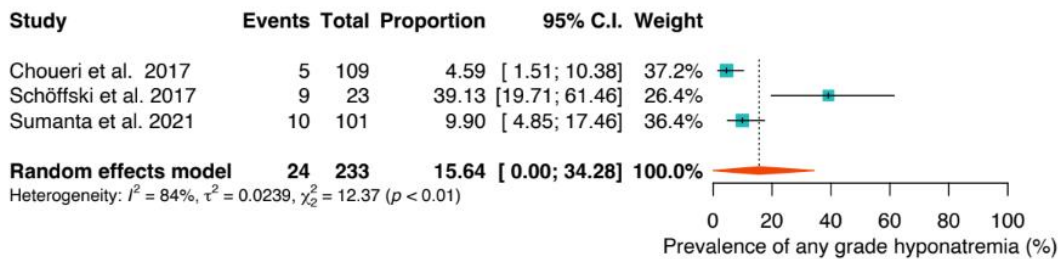

## F. Fatigue

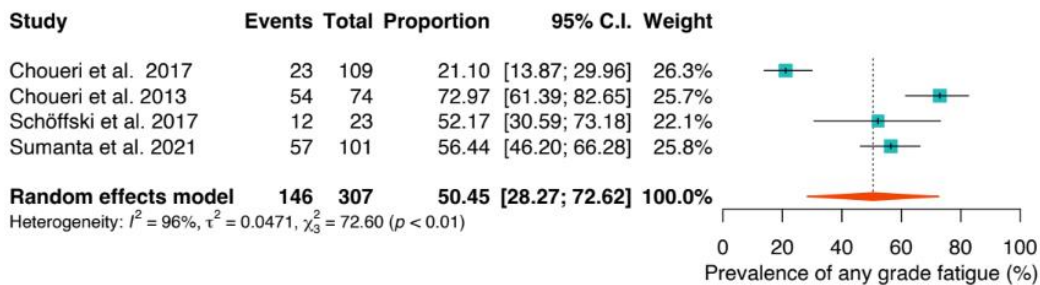

## G. Edema

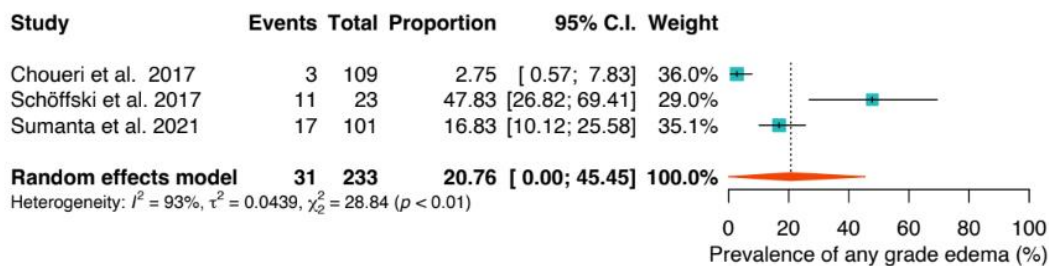

## H. Diarrhea

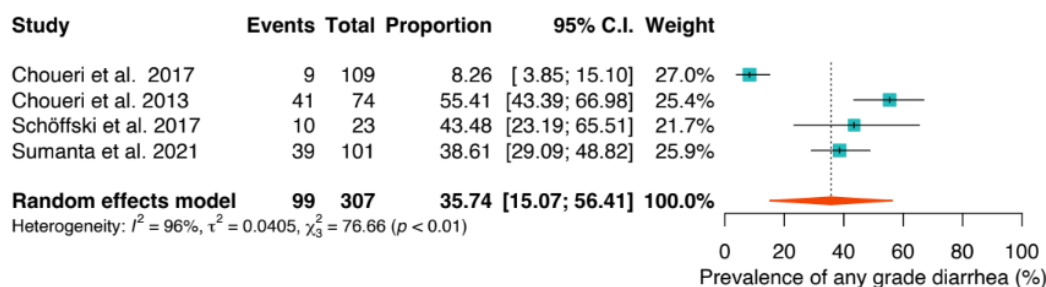

## I. Increased creatinine

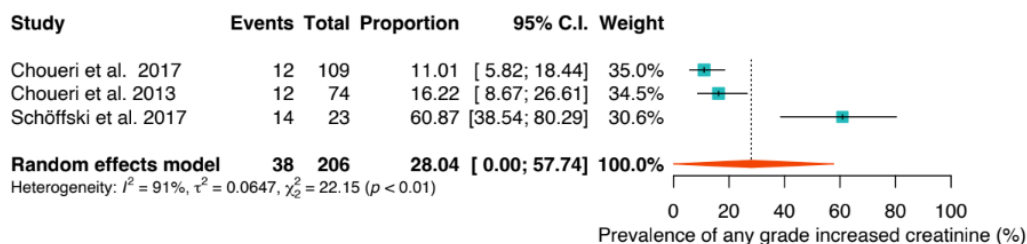

## J. Increased AST

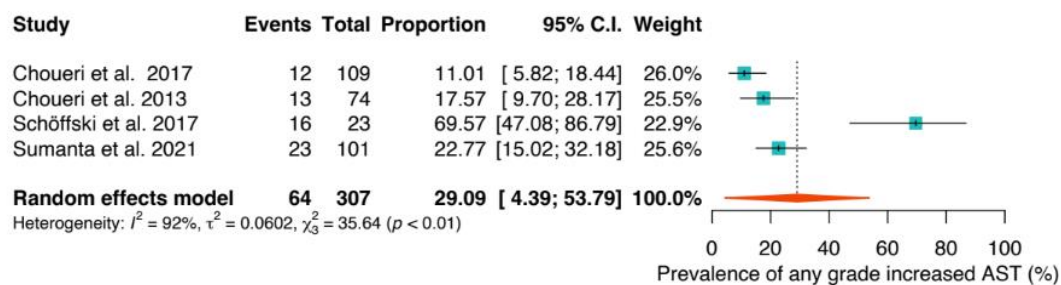

## K. Anorexia

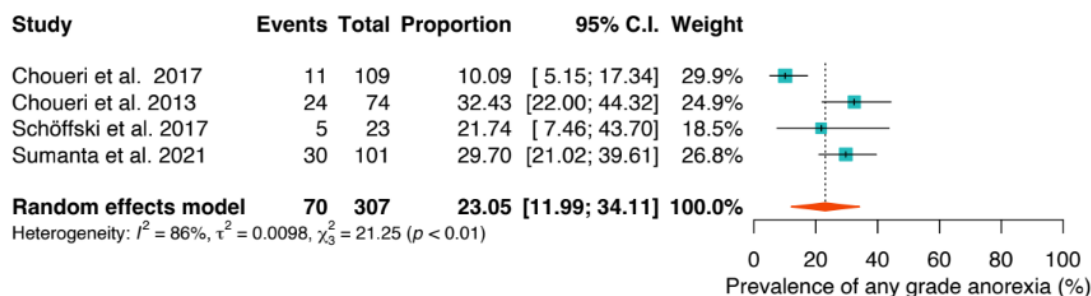

## L. Anemia

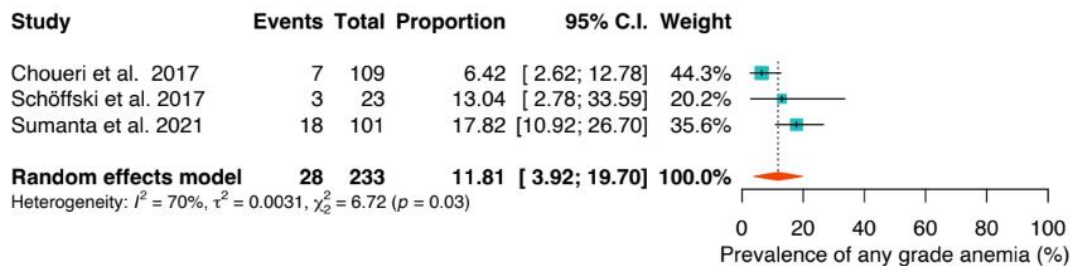

## M. Increased ALT

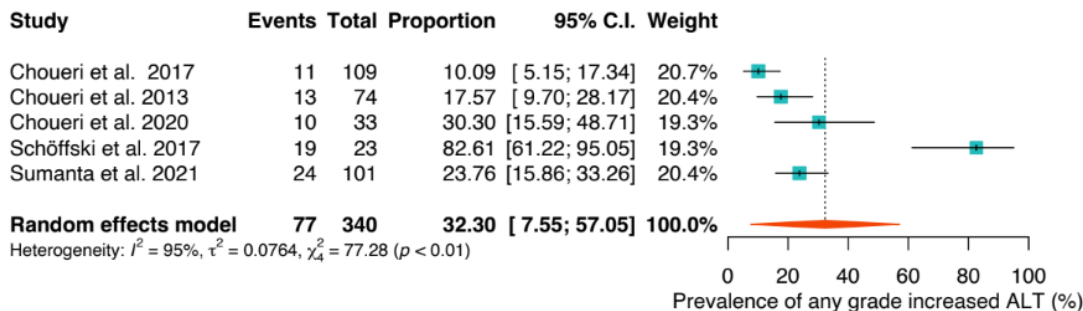

**Figure S12.** Grade  $\geq 3$  adverse events. **A.** Decreased WBC. **B.** Vomiting. **C.** Rash. **D.** Proteinuria. **E.** Decreased neutrophil Count. **F.** Nausea. **G.** Mucositis. **H.** Hyponatremia. **I.** Hypoalbuminemia. **J.** Hypertension. **K.** Fatigue. **L.** Extremity pain. **M.** Edema **N.** Dyspnea. **O.** Diarrhea. **P.** Increased creatinine. **Q.** Increased AST. **R.** Anorexia. **S.** Anemia. **T.** Increased ALT. **U.** Abdominal pain. Datas were sourced from reference [2,4–6].

## A. Decreased WBC

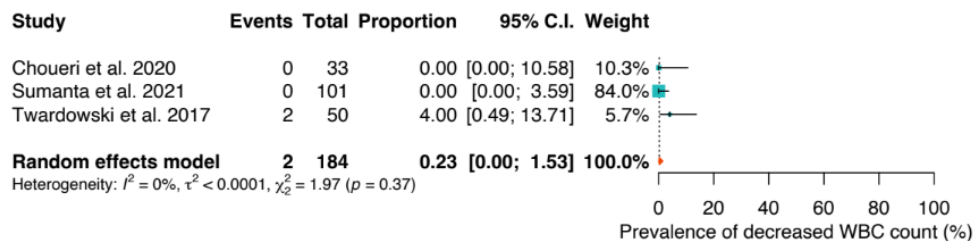

## B. Vomiting

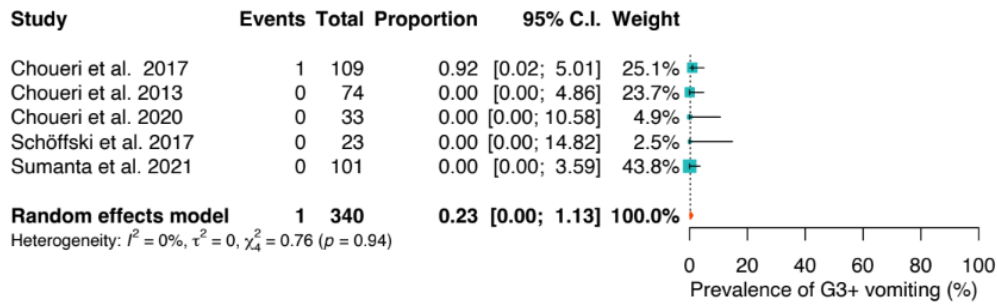

## C. Rash

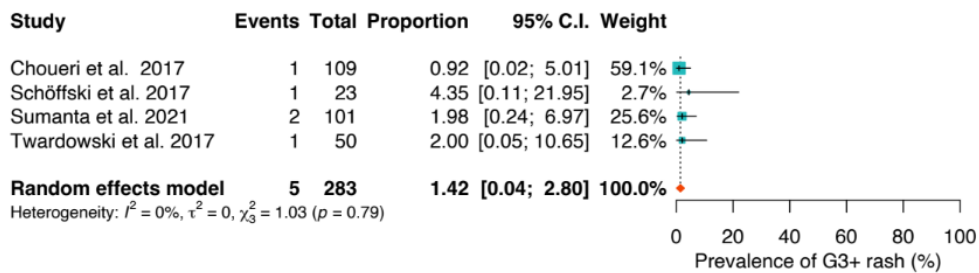

## D. Proteinuria

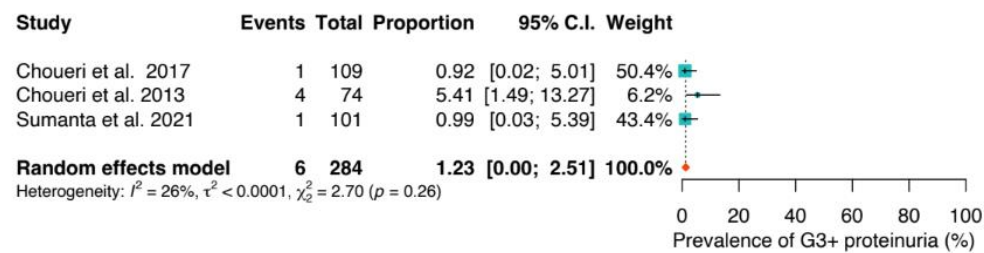

## E. Decreased neutrophil count

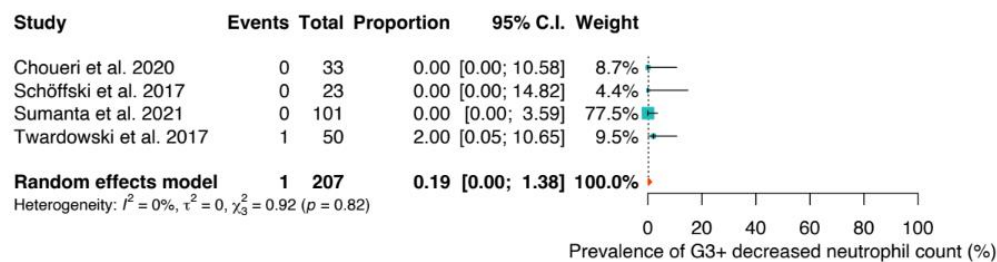

## F. Nausea

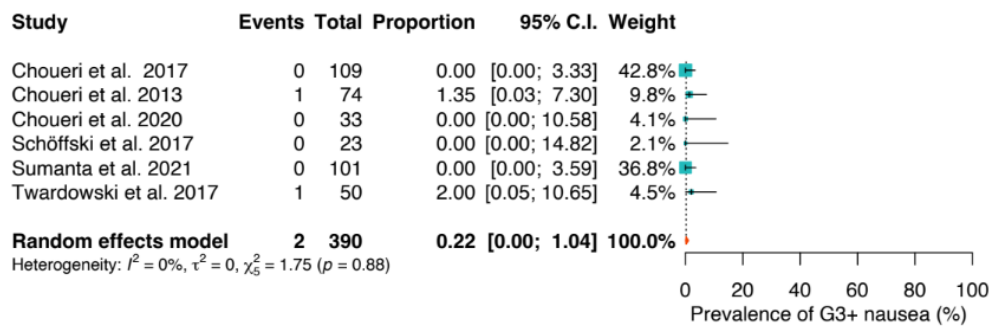

## G. Mucositis

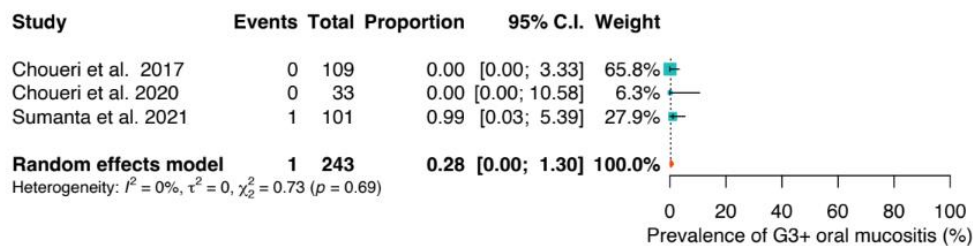

## H. Hyponatremia

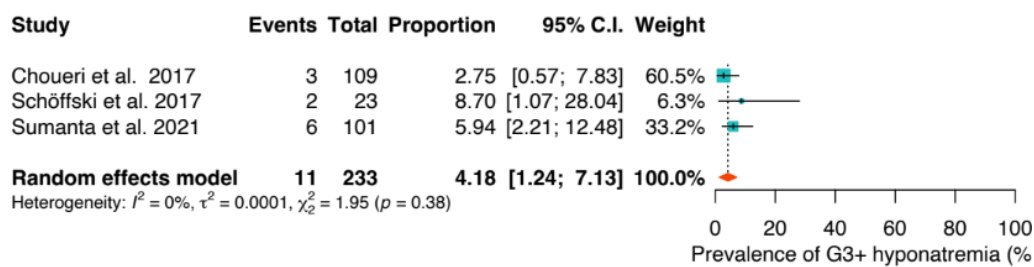

## I. Hypoalbuminemia

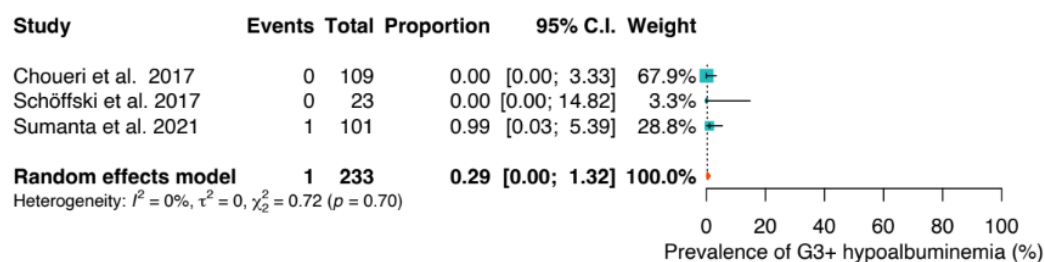

## J. Hypertension

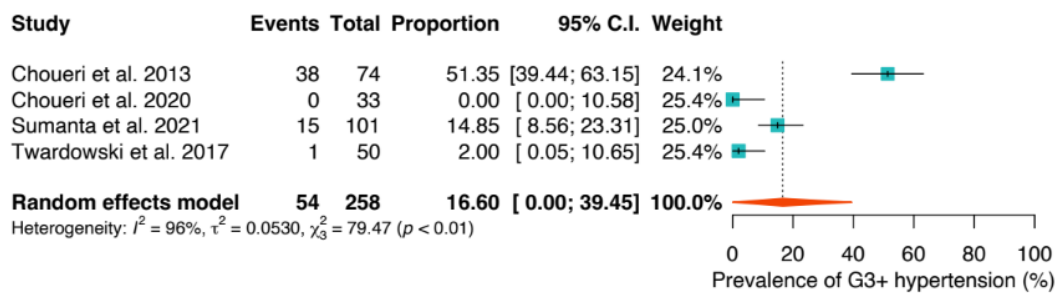

## K. Fatigue

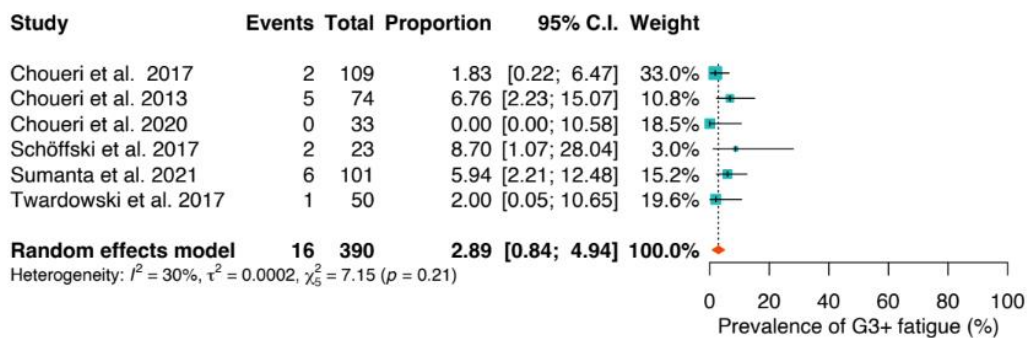

## L. Extremity pain

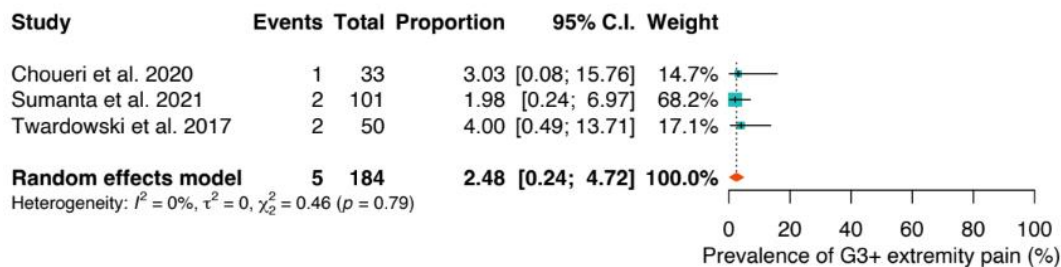

## M. Edema

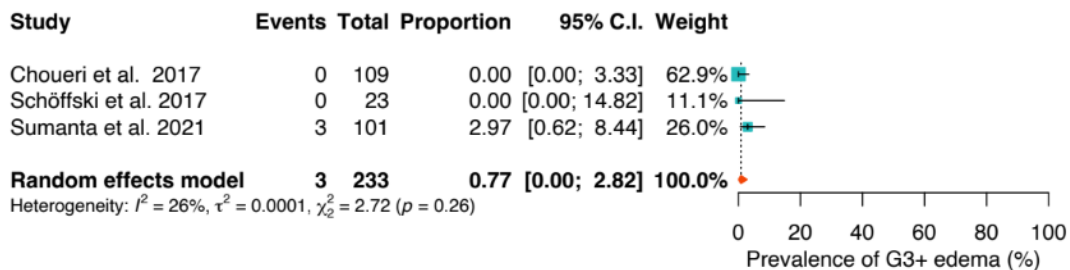



N. Dyspnea

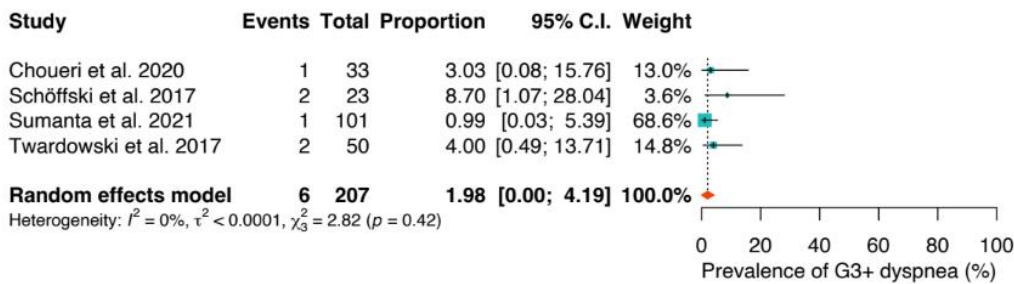

O. Diarrhea

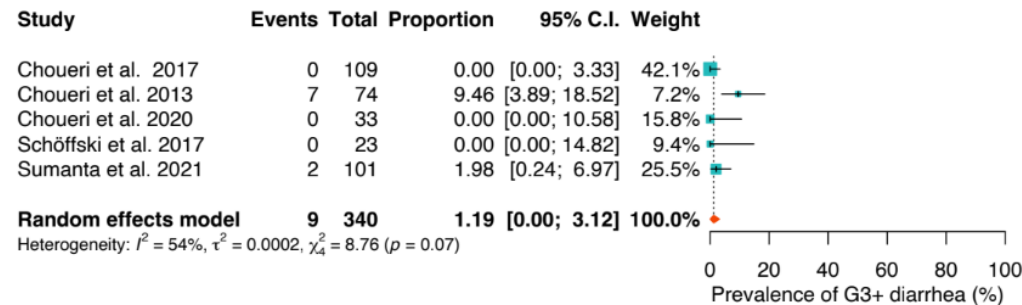

P. Increased creatinine

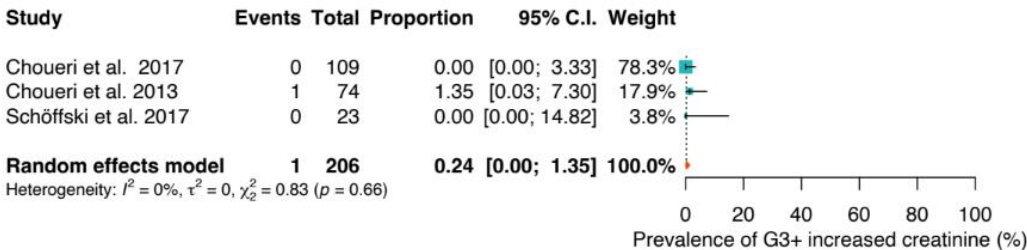



## Q. Increased AST

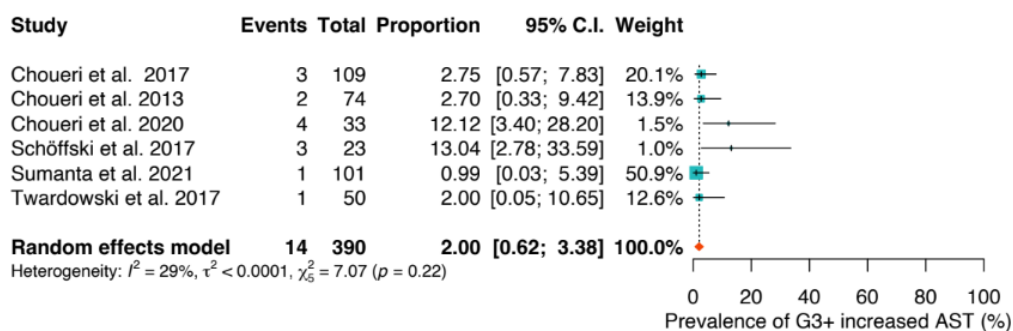

## R. Anorexia

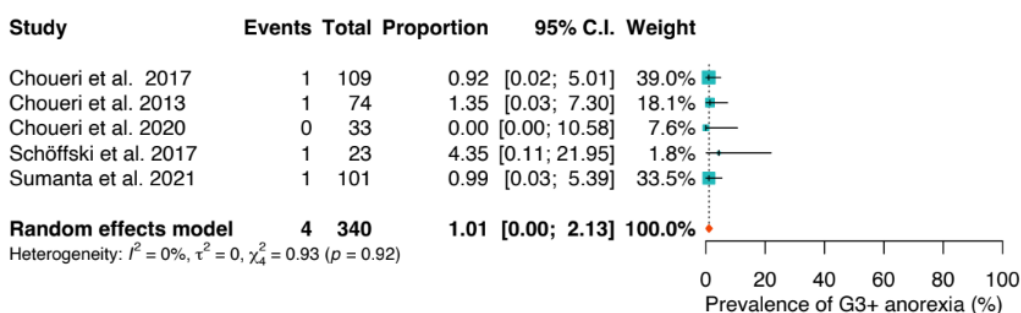

## S. Anemia

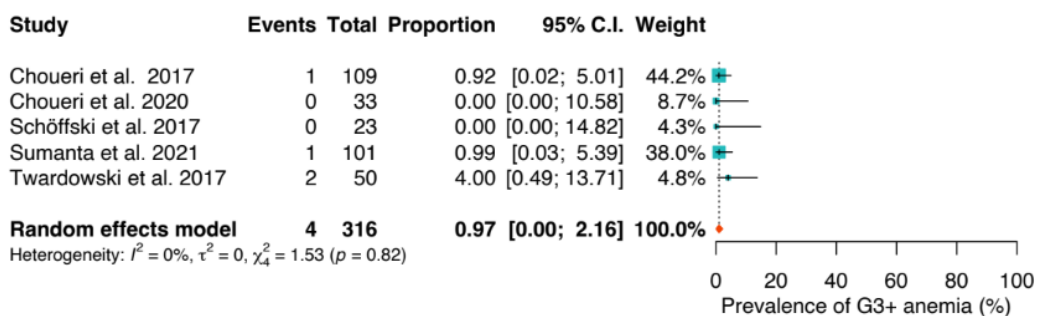

## T. Increased ALT

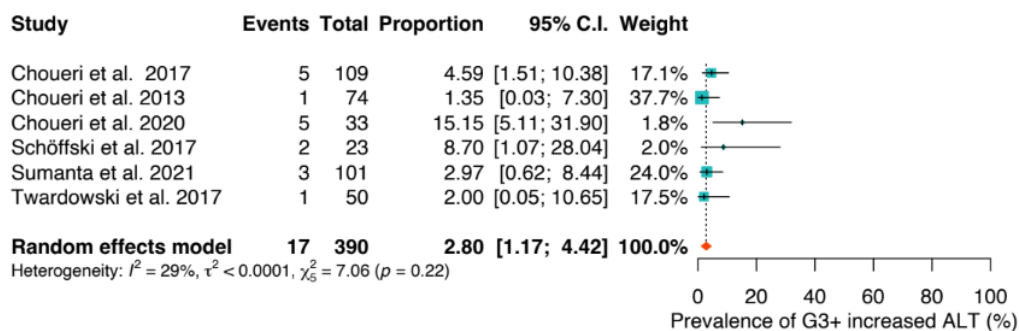

## U. Abdominal pain

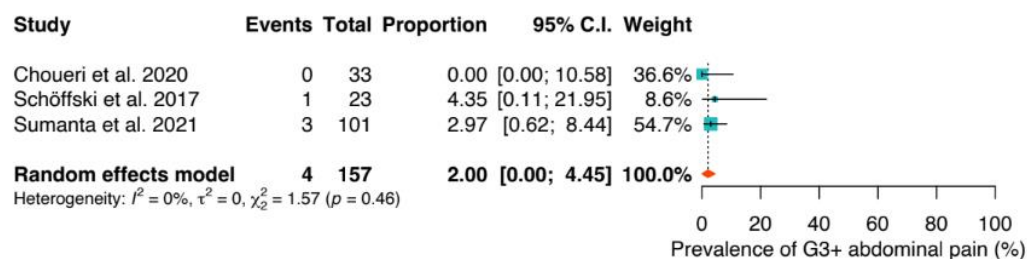

## Reference

1. Twardowski, P.W.; Tangen, C.M.; Wu, X.; Plets, M.R.; Plimack, E.R.; Agarwal, N.; Vogelzang, N.J.; Wang, J.; Tao, S.; Thompson, I.M.; et al. Parallel (Randomized) Phase II Evaluation of Tivantinib (ARQ197) and Tivantinib in Combination with Erlotinib in Papillary Renal Cell Carcinoma: SWOG S1107. *Kidney Cancer* **2017**, *1*, 123–132. <https://doi.org/10.3233/KCA-170018>.
2. Pal, S.K.; Tangen, C.; Thompson, I.M.; Balzer-Haas, N.; George, D.J.; Heng, D.Y.C.; Shuch, B.; Stein, M.; Tretiakova, M.; Humphrey, P.; et al. A Comparison of Sunitinib with Cabozantinib, Crizotinib, and Savolitinib for Treatment of Advanced Papillary Renal Cell Carcinoma: A Randomised, Open-Label, Phase 2 Trial. *Lancet* **2021**, *397*, 695–703. [https://doi.org/10.1016/S0140-6736\(21\)00152-5](https://doi.org/10.1016/S0140-6736(21)00152-5).
3. Choueiri, T.K.; Heng, D.Y.C.; Lee, J.L.; Cancel, M.; Verheijen, R.B.; Mellemgaard, A.; Ottesen, L.H.; Frigault, M.M.; L'Hernault, A.; Szigyarto, Z.; et al. Efficacy of Savolitinib vs Sunitinib in Patients With MET-Driven Papillary Renal Cell Carcinoma: The SAVOIR Phase 3 Randomized Clinical Trial. *JAMA Oncol.* **2020**, *6*, 1247–1255. <https://doi.org/10.1001/jamaoncol.2020.2218>.
4. Schöffski, P.; Wozniak, A.; Escudier, B.; Rutkowski, P.; Anthoney, A.; Bauer, S.; Sufliarsky, J.; van Herpen, C.; Lindner, L.H.; Grünwald, V.; et al. Crizotinib Achieves Long-Lasting Disease Control in Advanced Papillary Renal-Cell Carcinoma Type 1 Patients with MET Mutations or Amplification. EORTC 90101 CREATE Trial. *Eur. J. Cancer* **2017**, *87*, 147–163. <https://doi.org/10.1016/j.ejca.2017.10.014>.
5. Choueiri, T.K.; Vaishampayan, U.; Rosenberg, J.E.; Logan, T.F.; Harzstark, A.L.; Bukowski, R.M.; Rini, B.I.; Srinivas, S.; Stein, M.N.; Adams, L.M.; et al. Phase II and Biomarker Study of the Dual MET/VEGFR2 Inhibitor Foretinib in Patients with Papillary Renal Cell Carcinoma. *J. Clin. Oncol.* **2013**, *31*, 181–186. <https://doi.org/10.1200/JCO.2012.43.3383>.
6. Choueiri, T.K.; Plimack, E.; Arkenau, H.-T.; Jonasch, E.; Heng, D.Y.C.; Powles, T.; Frigault, M.M.; Clark, E.A.; Handzel, A.A.; Gardner, H.; et al. Biomarker-Based Phase II Trial of Savolitinib in Patients With Advanced Papillary Renal Cell Cancer. *J. Clin. Oncol.* **2017**, *35*, 2993–3001. <https://doi.org/10.1200/JCO.2017.72.2967>.
7. Martínez Chanzá, N.; Xie, W.; Asim Bilen, M.; Dzimitrowicz, H.; Burkart, J.; Geynisman, D.M.; Balakrishnan, A.; Bowman, I.A.; Jain, R.; Stadler, W.; et al. Cabozantinib in Advanced Non-Clear-Cell Renal Cell Carcinoma: A Multicentre, Retrospective, Cohort Study. *Lancet Oncol.* **2019**, *20*, 581–590. [https://doi.org/10.1016/S1470-2045\(18\)30907-0](https://doi.org/10.1016/S1470-2045(18)30907-0).
8. Tachibana, H.; Inakawa, T.; Nemoto, Y.; Ishihara, H.; Fukuda, H.; Yoshida, K.; Iizuka, J.; Hashimoto, Y.; Tanabe, K.; Kondo, T.; et al. Efficacy of Cabozantinib for Papillary Compared with Clear-Cell Renal Cell Carcinoma Following Immune Checkpoint Inhibitor Treatment. *Anticancer Res.* **2022**, *42*, 3151–3158. <https://doi.org/10.21873/anticancer.15804>.
9. Choueiri, T.K.; Heng, D.Y.C.; Lee, J.L.; Cancel, M.; Verheijen, R.B.; Mellemgaard, A.; Ottesen, L.H.; Frigault, M.M.; L'Hernault, A.; Szigyarto, Z.; et al. Efficacy of Savolitinib vs Sunitinib in Patients With MET-Driven Papillary Renal Cell Carcinoma: The SAVOIR Phase 3 Randomized Clinical Trial. *JAMA Oncol.* **2020**, *6*, 1247–1255. <https://doi.org/10.1001/jamaoncol.2020.2218>.
10. Suárez, C.; Larkin, J.M.G.; Patel, P.; Valderrama, B.P.; Rodriguez-Vida, A.; Glen, H.; Thistlethwaite, F.; Ralph, C.; Srinivasan, G.; Mendez-Vidal, M.J.; et al. Phase II Study Investigating the Safety and Efficacy of Savolitinib and Durvalumab in Metastatic Papillary Renal Cancer (CALYPSO). *J. Clin. Oncol.* **2023**, *41*, 2493–2502. <https://doi.org/10.1200/JCO.22.01414>.
